# Supplementary material for: Parenting style and the non-cognitive development of high school student: evidence from rural China
Source: Frontiers journal article supplement (doi:10.3389/fpsyg.2024.1393445), 2024-07-18
Supplement: Data_Sheet_1.docx [file Data_Sheet_1.docx]

Supplementary Material

# Supplementary Tables

| **TABLE 1A Construction of noncognitive ability measures** | |
| --- | --- |
| **Dimensions** | **Items** |
| Conscientiousness | Do things rigorously and carefully |
| Often lazy® |
| Efficient in doing things |
| Extroversion | Talkative |
| Cheerful and sociable |
| Reserved and conservative® |
| Agreeableness | Sometimes rude and impolite to others® |
| Naturally forgiving |
| Considerate and kind to almost everyone |
| Openness | Creative and generates new ideas |
| Values art and aesthetic experiences |
| Imaginative |
| Emotional Stability | Often worries® |
| Easily nervous® |
| Relaxed and copes well with stress |
| Notes: ® means this item should be reverse-scored. | |

| **Table 2A Association between specific parenting styles dimensions and student's noncognitive abilities** | | | | | |
| --- | --- | --- | --- | --- | --- |
|  | Conscientiousness | Extroversion | Agreeableness | Openness | Emotional stability |
|  |
| ***Authoritative parenting*** | |  |  |  |  |  |
| Connection dimension | 0.089** | 0.070** | 0.095** | 0.115** | 0.045 |  |
|  | (0.018) | (0.017) | (0.006) | (0.007) | (0.032) |  |
| **Adj. R2** | 0.031 | 0.012 | 0.011 | 0.048 | 0.042 |  |
| Regulation dimension | 0.077** | 0.060** | 0.095** | 0.114** | 0.034 |  |
|  | (0.008) | (0.011) | (0.010) | (0.005) | (0.016) |  |
| **Adj. R2** | 0.030 | 0.012 | 0.011 | 0.048 | 0.042 |  |
| Autonomy Granting dimension | 0.104** | 0.057** | 0.085** | 0.105** | 0.081** |  |
|  | (0.002) | (0.010) | (0.006) | (0.010) | (0.018) |  |
| **Adj. R2** | 0.034 | 0.012 | 0.011 | 0.048 | 0.045 |  |
| ***Authoritarian parenting*** | |  |  |  |  |  |
| Physical Coercion dimension | -0.067** | 0.008 | -0.066** | -0.014 | -0.029* |  |
|  | (0.010) | (0.005) | (0.005) | (0.008) | (0.009) |  |
| **Adj. R2** | 0.029 | 0.009 | 0.008 | 0.041 | 0.041 |  |
| Verbal Hostility dimension | -0.096** | 0.011 | -0.043 | 0.012 | -0.069** |  |
|  | (0.009) | (0.005) | (0.018) | (0.009) | (0.008) |  |
| **Adj. R2** | 0.031 | 0.010 | 0.007 | 0.041 | 0.043 |  |
| Non-Reasoning/Punitive dimension | -0.072** | -0.010 | -0.061** | -0.023* | -0.051** |  |
|  | (0.007) | (0.007) | (0.003) | (0.008) | (0.005) |  |
| **Adj. R2** | 0.030 | 0.010 | 0.008 | 0.041 | 0.043 |  |
| Controls | YES | YES | YES | YES | YES |  |
| Class fixed effect | YES | YES | YES | YES | YES |  |
| Observations | 6549 | 6549 | 6549 | 6549 | 6549 |  |
| Notes: Each cell is a separate regression. Controls include child age (in years), gender, Hukou, minority; family size, number of siblings of child, whether the child's parents was the primary caregiver, whether the household of the child is poverty-stricken households, educational attainment of father and mother, and a factor of household wealth. All standard errors account for clustering at the class level. *p<0.05; **p<0.01 | | | | | |  |
|  |
|  |

| **TABLE 3A Distribution of groups with different combinations of authoritative and authoritarian parenting styles** | | | |
| --- | --- | --- | --- |
| **Parenting style** | **Frequency** |  | **Percentage (%)** |
|  |
| Group 1(high authoritative, low authoritarian) | 1825 |  | 27.87 |  |
| Group 2 (low authoritative, high authoritarian) | 2074 | 31.67 |  |
| Group 3 (high authoritative, high authoritarian) | 1583 | 24.17 |  |
| Group 4 (low authoritative, low authoritarian) | 1067 | 16.29 |  |
| Notes: The cutoffs of the classification are the means of the authoritative and authoritarian subscale score | | | |  |

| **Table 4A Association between combinations of parenting styles and students' noncognitive abilities** | | | | | |
| --- | --- | --- | --- | --- | --- |
|  | Conscientiousness | Extroversion | Agreeableness | Openness | Emotional stability |
|  |
| Group 1(high authoritative, low authoritarian) | 0.164** | 0.134** | 0.169** | 0.236** | 0.048 |  |
| (0.021) | (0.031) | (0.028) | (0.019) | (0.056) |  |
| Group 2 (low authoritative, high authoritarian) | -0.046** | -0.042 | -0.009 | -0.080** | -0.060* |  |
| (0.010) | (0.019) | (0.012) | (0.010) | (0.022) |  |
| Group 3 (high authoritative, high authoritarian) | 0.053** | 0.110* | 0.135** | 0.211** | 0.011 |  |
| (0.008) | (0.029) | (0.015) | (0.011) | (0.031) |  |
| Controls | YES | YES | YES | YES | YES |  |
| Class fixed effect | YES | YES | YES | YES | YES |  |
| Adj. R2 | 0.034 | 0.012 | 0.012 | 0.050 | 0.042 |  |
| Observations | 6549 | 6549 | 6549 | 6549 | 6549 |  |
| Notes: Four groups were created according to the mean values of the distributions of the authoritative and authoritarian parenting dimensions. In the analysis, we use Group 4 as the reference group. All standard errors account for clustering at the class level. *p<0.05; **p<0.01 | | | | | |  |
|  |
